# Supplementary material for: Redox controls on methane formation, migration and fate in shallow aquifers
Source: Copernicus journal article supplement (doi:10.5194/hess-2016-85), 2016-03-16
Supplement: Supplementary file [file hess-2016-85-AC1-supplement.pdf]

## **Redox controls on methane formation, migration and fate in shallow aquifers” by P. Humez et al.**

### **- Answer to comments by reviewer 1 (Dr. McIntosh) -**

**Dear Dr. McIntosh:**

**Thank you for having reviewed this manuscript and for your very constructive comments. Please find below our responses for each of your specific comments indicated as AC (Authors Comments) in bold.**

Review of Humez et al. for HESS

It was a pleasure reading the manuscript by Humez et al. on coupled aqueous and gas chemistry and isotopes of groundwater in shallow aquifers in Alberta to determine processes of methane formation, removal, and migration. The study uses a multitracer approach that can/should be used in other study areas to identify controls on the natural and/or anthropogenic occurrence of methane in groundwater. The paper is well-written, the figures are beautiful, and the conclusions are robust. I have a few minor suggestions on improvement prior to publication, mostly grammatical errors and a few statements that need more explanation.

Specific comments

Pg 2, Line 21, my last name is misspelled: “McInstosh et al., 2014” should be “McIntosh”.

**AC: This correction has been made in the revised version of our manuscript.**

Pg 2, Line 28, our companion paper to McIntosh et al. (2014), “Hamilton et al. (2015) Hydrogeology Journal” compared water chemistry to methane concentration in groundwater in Ontario, similar to your study. Please include this reference.

**AC: This reference has been added to the revised version of our manuscript.**

Pg 3, Lines 20-23: Methanogenic systems can also have high d13C-CH4 values from closed system CO2-reduction, where most of the CO2 pool has been depleted, and d13C values of CH4 and CO2 become increasingly more positive (up to -50+ per mil in some cases). This is another way that d13C-CH4 values can seem “artificially” high, but still be methanogenic. See Bates et al. (2011) Chemical Geology. I would add a sentence on this here and point out that d13C-CO2 and/or d13C-DIC values can help distinguish these relatively positive d13C-CH4 values from methanogenic vs. thermogenic gas sources.

**AC: This is a very good point. To address this we have added the following statements to the revised version of our manuscript: “Methanogenic systems can also be characterized by high  $\delta^{13}\text{C}_{\text{CH}_4}$  values and thus by a pseudo-thermogenic methane isotope signature as a results of CO<sub>2</sub> reduction in a closed system. Under such circumstances,  $\delta^{13}\text{C}$  values of CH<sub>4</sub> and CO<sub>2</sub> both increase as the CO<sub>2</sub> pool becomes progressively depleted (Whiticar et al., 1986; Whiticar, 1999; Bates et al., 2011). Hence,  $\delta^{13}\text{C}_{\text{CO}_2}$  and  $\delta^{13}\text{C}_{\text{DIC}}$  values constitute an additional parameter that can help to distinguish whether elevated  $\delta^{13}\text{C}$  values of methane are associated with biogenic methane formation or thermogenic gas sources (Whiticar et al., 1986; Whiticar, 1999)”.**

Pg 7, Line 28, change “adding” to “summing”.

**AC: This correction has been made in the revised version of our manuscript.**

Pg 9, Line 17, “closed” should be “close” to the LMWL.

**AC: This correction has been made in the revised version of our manuscript.**

Pg 10, section 3.6. Did you measure  $\delta^{13}\text{C}$ -C2 values? If so, include. This could help identify microbial oxidation of higher chain hydrocarbons, microbial production of ethane, or mixing with thermogenic gas.

**AC: This is a very good point. The C isotope ratios of ethane have been measured on 19 samples. The plot of concentrations versus  $\delta^{13}\text{C}$  values of ethane is displayed below. For a sub-set of samples there is a trend of increasing  $\delta^{13}\text{C}$  values with decreasing ethane concentration, consistent with ethane oxidation. All these samples are from the “mixed category”, and we feel that this observation does not add much new insight into the existing discussion. Hence, we prefer not to add this information unless the editor and/or reviewer strongly suggest otherwise.**

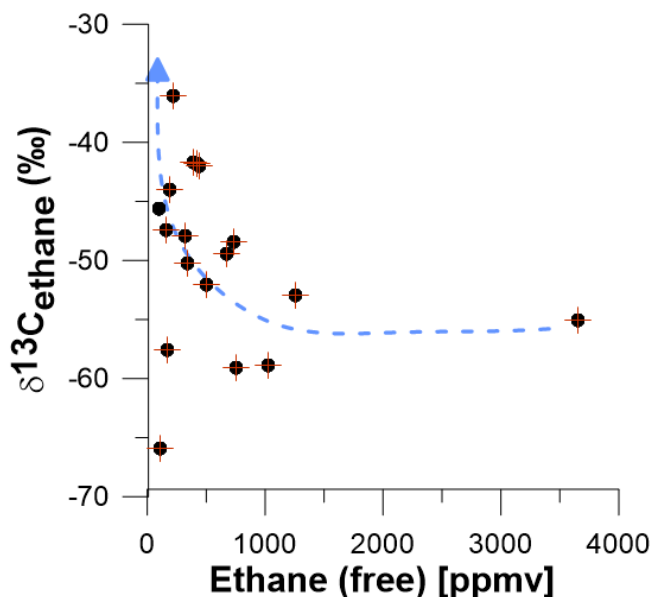

Pg 11, Line 6+, we also found the highest methane values in groundwater in Ontario associated with Na-Cl and Na-HCO<sub>3</sub> type waters (see McIntosh et al., 2014; Hamilton et al., 2015).

**AC: Thank you for pointing this out. We have added the above references to this statement.**

Figure 5: Plot end-members on the other plots in Figure 5.

**AC: The end-members have been integrated in the new version of Figure 5.**

Pg 11, Line 14, Needs further explanation. Does your data (e.g. lack of Br??) differentiate between these two sources of Na-rich waters: brines versus cation exchange? Reader is left wondering which of these processes is important here, which can have implications for fluid migration vs. in-situ water-rock reactions.

**AC: The Br concentrations have been analyzed and we have created a plot of Cl/Br ratios vs Cl concentrations (see plot below) with current seawater shown as a dashed blue line.**

The Cl/Br ratios of our samples are in the range of ratios previously reported for other groundwater samples from Canada and United States (blue area in Figure below according to Gue et al. 2015; Davis et al., 2004). We stated in the original manuscript that Na-rich waters are due to either mixing with deep saline water and/or cation exchange. The plot below provides further initial insights by suggesting that samples with elevated Na and Cl concentrations appear to be mixtures between low TDS groundwater and high TDS formation waters (see crosses in Figure below, Connelly et al. 1990). We also observed that 7 of 8 samples with Cl concentration > 200 mg/L fall in the highest methane concentration category of > 1.0 mM and belong to category #4. This provides an initial indication that in select cases elevated methane in groundwater may be associated with admixture of deeper saline water rather than associated with Na-bicarbonate water type due to cation exchange processes. However, this hypothesis about methane migration pathways requires significant further testing based on regional hydrodynamic and geochemical data, which we intend to conduct in 2016. At this point, we feel that we have insufficient clear evidence to further discuss these options, and therefore intend to delete the sentences “.....”.

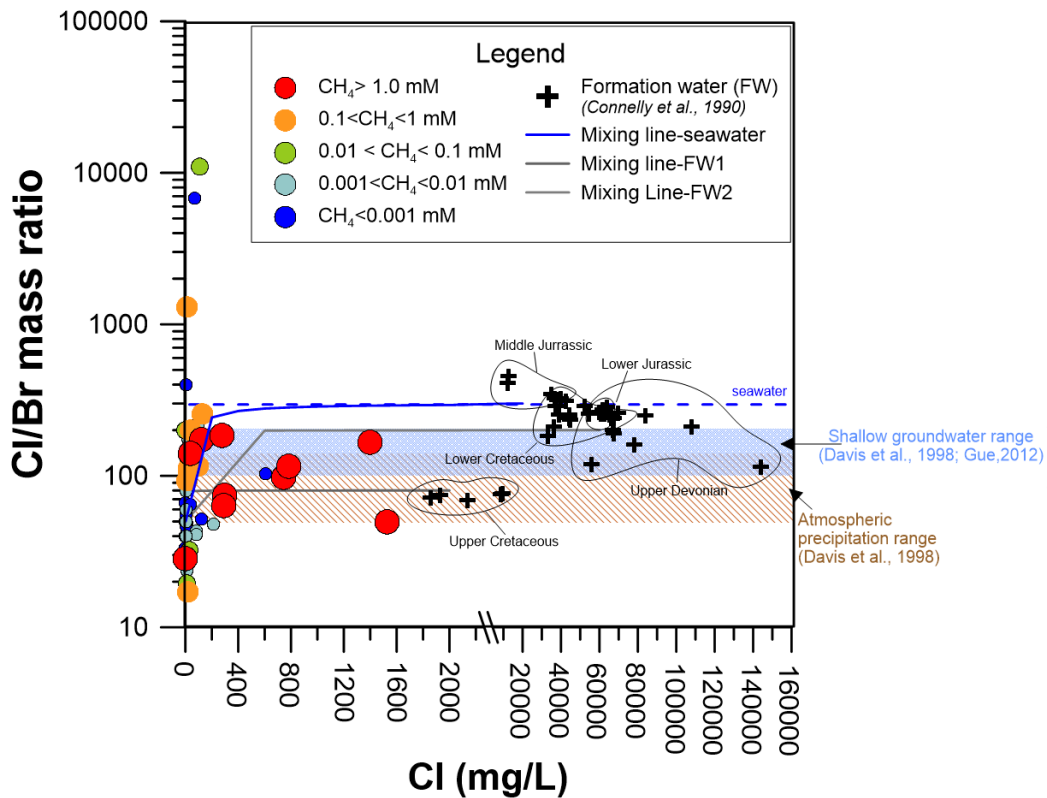

Pg 12, Line 9, your results of finding high CH<sub>4</sub> only when [SO<sub>4</sub>]<sup>2-</sup> < 1 mM is consistent with what has been observed in deeper coalbed methane and organic-rich shale microbial gas systems. I would make this link by adding a sentence and reference to that literature. See Schlegel et al. (2011) or other reference.

AC: Thank you for this valuable suggestion. Following your suggestion we have added the following statement and reference to the revised version of our manuscript: “This result is

**consistent with what has been observed in deeper coalbed methane and organic-rich shale microbial gas systems (Schlegel et al., 2011)."**

Pg 13, Line 2, add "CH<sub>4</sub>" to your list of isotopic compositions investigated.

**AC: This has been changed in the revised version of our manuscript.**

Pg 13, Section 4.3.1. The question mark for group 3 in Figure 8 needs an explanation– i.e. what does the "question mark" represent?

**AC: This question mark has been removed from Fig. 8 in the revised version of our manuscript to avoid confusion.**

Pg 14, Line 20+, This part needs clarification because you go on to say, and show in Figure 11, that there are some samples with evidence of methane oxidation, whereas you say here that there is no evidence of oxidation. Be more specific here, or simply remove statement and save for later when you discuss the higher d<sup>13</sup>C-CH<sub>4</sub> values.

**AC: This statement has been deleted here and has been moved into section 4.4.4.4 of the revised version of our manuscript.**

Pg 15, Line 27, "has not yet been oxidized" – be more specific: e.g. there is no evidence of methane oxidation because the elevated d<sup>13</sup>C-CH<sub>4</sub> values are not associated with low d<sup>13</sup>C-DIC values, as expected for methane oxidation.

**AC: As suggested, this sentence has been added in the revised version of our manuscript.**

Pg 16, Line 8, change "imparting a d<sup>13</sup>C value" to "imparting a relatively high d<sup>13</sup>C value".

**AC: This modification has been integrated in the revised version of our manuscript.**

Pg 16, Line 10, "It is also possible that post-sampling degradation of low-methane samples occurred." Be more specific. What could have happened (physically) and how might that have changed the isotopic values?

**AC: The statement "post-sampling degradation of low-methane samples occurred" refers to potential slow diffusive gas loss from sampling containers resulting in <sup>13</sup>C enrichment in the residual methane. This has been clarified in the revised version of the manuscript.**

Pg 17, Line 23, change "interpretation of gas composition" to "interpretation of natural gas composition."

**AC: This correction has been added to the revised version of our manuscript.**

Pg 18, Line 3: add an "and" between "d<sup>13</sup>C, dD".

**AC: This has been corrected in the revised version of our manuscript.**

Pg 18, Line 7, be more specific about this statement. For example, could add text at the end of the sentence: "such as the introduction of deeply-sourced thermogenic gases into shallow aquifers."

**AC: We have followed the advice of the reviewer and have added this statement to the revised version of our manuscript.**

Figure 3, part b, It's not clear what the "(C(-4)) becomes stable" label represents. Need to explain in the figure caption and/or text.

**AC: This note has been removed from Fig. 3 in the revised version of our manuscript to avoid confusion.**

Figure 11, part b, there wasn't much (if any?) discussion of the d<sup>2</sup>H-CH<sub>4</sub> values in the text - add.

BTW - I'm no longer using this plot in my own research because I've found that it is misleading; the  $\delta D-CH_4$  values are low in these western, higher latitude regions not because of a shift in metabolic pathway to "methyl type fermentation", but rather because of isotopic exchange between the 2H in the  $CH_4$  and  $H_2O$  (shown in several studies now). Recent microbial studies from several coalbed methane and black shale systems show that both  $CO_2$  reduction and acetoclastic methanogenesis are typically important/present. I have a paper in review on this topic that will hopefully be published soon. In the meantime, see Bates et al. (2011) Chemical Geology for a reference.

**AC: We fully agree with the reviewer's reasoning especially since the  $\delta^2H$  values of groundwater in Alberta are very negative. We therefore have removed Figure 11b and the associated discussion in the text.**

Figure 12, part b, need to subscript " $CH_4$ " in the y-axis label.

**AC: This subscript has been added in the y-axis label of Fig. 12 in the revised version of our manuscript.**

**We hope that these changes address your concerns in a satisfactory manner.**

**With best regards on behalf of all co-authors,**

**Dr. Pauline Humez**
